# Supplementary material
Source: PubMed Central journal article supplement (PMC3006245)
Supplement: supp_00367.2010_table.pdf [file supp_00367.2010_table.pdf]

1 Supplementary Table 1. Enterocyte apoptosis and mitosis in rats with SBS treated with TPN and  
 2 GLP-2<sup>1</sup>.

| Treatments                              | Oral<br>Reference<br>N=8 <sup>2</sup> | TPN<br>Control<br>N=5        | Sustained<br>GLP-2<br>N=7     | Early GLP-2,<br>d 7 group<br>N=10 | Early GLP-2,<br>d 18 group<br>N=6 | Delayed<br>GLP-2<br>N=8      |
|-----------------------------------------|---------------------------------------|------------------------------|-------------------------------|-----------------------------------|-----------------------------------|------------------------------|
| <b><u>Crypt</u></b>                     |                                       |                              |                               |                                   |                                   |                              |
| Cells per crypt<br>column, n            | 24 ± 0.3 <sup>c</sup>                 | 24 ± 0.3 <sup>c</sup>        | 29 ± 0.3 <sup>a</sup>         | 28 ± 0.2 <sup>b</sup>             | 24 ± 0.3 <sup>c</sup>             | 28 ± 0.3 <sup>b</sup>        |
| Apoptotic cells<br>per column, n        | 0.06±0.01 <sup>bc</sup>               | 0.10±0.01 <sup>a</sup>       | 0.05± 0.01 <sup>c</sup>       | 0.02±0.01 <sup>c</sup>            | 0.09 ± 0.01 <sup>ab</sup>         | 0.04±0.01 <sup>c</sup>       |
| Apoptotic<br>index, % <sup>3</sup>      | 0.24±0.04 <sup>c</sup>                | 0.40±0.06 <sup>a</sup>       | 0.16±0.05 <sup>cd</sup>       | 0.09±0.04 <sup>d</sup>            | 0.36±0.05 <sup>ab</sup>           | 0.14±0.04 <sup>cd</sup>      |
| Mitotic cells<br>per crypt<br>column, n | 0.90±0.02 <sup>c</sup>                | 0.92±0.03 <sup>c</sup>       | 1.38±0.02 <sup>a</sup>        | 1.34±0.02 <sup>ab</sup>           | 0.95±0.02 <sup>c</sup>            | 1.31±0.02 <sup>ab</sup>      |
| Mitotic index,<br>% <sup>3</sup>        | 3.76±0.08 <sup>b</sup>                | 3.84±0.1 <sup>b</sup>        | 4.82±0.08 <sup>a</sup>        | 4.86±0.07 <sup>a</sup>            | 3.92±0.09 <sup>b</sup>            | 4.67±0.08 <sup>a</sup>       |
| <b><u>Villus</u></b>                    |                                       |                              |                               |                                   |                                   |                              |
| Cells per villus<br>column, n           | 87 ± 1 <sup>c</sup>                   | 81 ± 2 <sup>d</sup>          | 107 ± 1 <sup>a</sup>          | 108 ± 1 <sup>a</sup>              | 81 ± 2 <sup>d</sup>               | 103 ± 1 <sup>b</sup>         |
| Apoptotic cells<br>per column, n        | 0.06±0.01 <sup>c</sup>                | 0.14±0.0 <sup>b</sup>        | 0.05±0.01 <sup>cd</sup>       | 0.02±0.01 <sup>d</sup>            | 0.18±0.01 <sup>a</sup>            | 0.04±0.01 <sup>cd</sup>      |
| Apoptotic<br>index, % <sup>3</sup>      | 0.07±0.01 <sup>c</sup>                | 0.17±0.0 <sup>b</sup>        | 0.05±0.01 <sup>cd</sup>       | 0.02±0.01 <sup>d</sup>            | 0.22±0.01 <sup>a</sup>            | 0.04±0.01 <sup>cd</sup>      |
| Mitotic cells<br>per villus             | 0.018±0.00<br>5 <sup>a</sup>          | 0.016±0.0<br>6 <sup>ab</sup> | 0.006±0.00<br>5 <sup>ab</sup> | 0.010±0.004 <sup>ab</sup>         | 0.003±0.006 <sup>ab</sup>         | 0.003±0.00<br>5 <sup>b</sup> |

| column, n                        |                              |                              |                               |                           |                           |                              |
|----------------------------------|------------------------------|------------------------------|-------------------------------|---------------------------|---------------------------|------------------------------|
| Mitotic index,<br>% <sup>3</sup> | 0.020±0.00<br>5 <sup>a</sup> | 0.020±0.0<br>07 <sup>a</sup> | 0.006±0.00<br>6 <sup>ab</sup> | 0.001±0.005 <sup>ab</sup> | 0.005±0.006 <sup>ab</sup> | 0.003±0.00<br>5 <sup>b</sup> |

3

4 <sup>1</sup>Values are means ± SE. Means in a row with different superscripts differ, p<0.05.

5

6 <sup>2</sup> The number of rats in each treatment group. Animals received exclusive TPN for 18 days with  
7 the exception of the oral non-surgical reference group and the early GLP-2, 7-day group killed 7  
8 days after resection plus TPN.

9

10 <sup>3</sup>Apoptotic index in the crypt and villus is defined as the total number of apoptotic cells  
11 expressed as a percentage of the total number of cells counted in 50 well-oriented crypt or villus  
12 columns, respectively. Mitotic index in the crypt and villus was calculated similarly.

13
